# Supplementary material for: Gelatine-based foams produced by enzymatic foaming: formulation–structure relationships affecting expansion and stability
Source: Royal Society of Chemistry journal article supplement (doi:10.1039/d6ra00030d), 2026-03-02
Supplement: d6ra00030d1.pdf [file d6ra00030d1.pdf]

## Electronic Supplementary Information (ESI)

Supplementary data support the formulation–structure relationships discussed in the main manuscript.

This Electronic Supplementary Information provides detailed experimental data, statistical analyses, and additional figures supporting the formulation optimisation and structure–property relationships discussed in the main manuscript. The ESI includes raw measurements, calculated expansion ratios and volume retention ratios, and complete one-way ANOVA and Tukey HSD post hoc outputs for all formulation variables investigated. Foam expansion and structural fixation occurred within seconds under all conditions; therefore,  $L_0$  was recorded immediately after visible cessation of macroscopic expansion.

Unless otherwise stated, foam formation was conducted under open-headspace conditions. In selected photographic figures, samples were briefly placed in loosely capped vials after initial foaming to minimise disturbance during imaging while maintaining internal headspace.

Foam expansion was quantified using height-based measurements and expressed as the expansion ratio ( $L_{\text{foam}}/L_{\text{soln}}$ ), where  $L_{\text{foam}}$  is the foam height immediately after solidification and  $L_{\text{soln}} = 0.55$  cm corresponds to the initial solution height for a 10 mL formulation. Foam stability was evaluated after 24 h at 37 °C and reported as the volume retention ratio ( $V_{24}/V_0 = L_{\text{foam},24 \text{ h}}/L_{\text{foam},0}$ ). Height-based measurements were used as a practical approximation of relative volume changes, assuming approximately cylindrical geometry, which is justified by the uniform expansion observed within the cylindrical vessels.

Unless otherwise stated, all experiments were performed in triplicate ( $n = 3$ ), and data are reported as mean  $\pm$  standard error of the mean (SEM). Statistical significance was assessed using one-way ANOVA followed by Tukey’s HSD post-hoc testing ( $p < 0.05$ ).

### 1.1 Effect of Gelatine Concentration on the Expansion Ratio of Solidified Gelatine-Based Foam:

| wt. % Gelatine | Vsol n = Lsol n | Vfoam-1 | Vfoam-2 | Vfoam-3 | Expansion Ratio-1 | Expansion Ratio-2 | Expansion Ratio-3 | Mean Expansion Ratio | SEM  |
|----------------|-----------------|---------|---------|---------|-------------------|-------------------|-------------------|----------------------|------|
| 1              | 0.55            | 6.3     | 5.9     | 6.2     | 11.45             | 10.73             | 11.27             | 11.15                | 0.22 |
| 2              | 0.55            | 6.5     | 6.7     | 6.5     | 11.82             | 12.18             | 11.82             | 11.94                | 0.12 |
| 3              | 0.55            | 6       | 6.2     | 5.9     | 10.91             | 11.27             | 10.73             | 10.97                | 0.16 |
| 4              | 0.55            | 5.9     | 5.8     | 6.1     | 10.73             | 10.55             | 11.09             | 10.79                | 0.16 |
| 5              | 0.55            | 5.8     | 5.9     | 5.8     | 10.55             | 10.73             | 10.55             | 10.61                | 0.06 |

**Table S1:** Expansion Ratio of Solidified Foam at Varying Gelatine Concentrations. Foam was synthesised with fixed concentrations of hydrogen peroxide (3 wt. %), catalase (0.2 wt. %), and glutaraldehyde (2.5 wt. %) in a 10 mL solution.

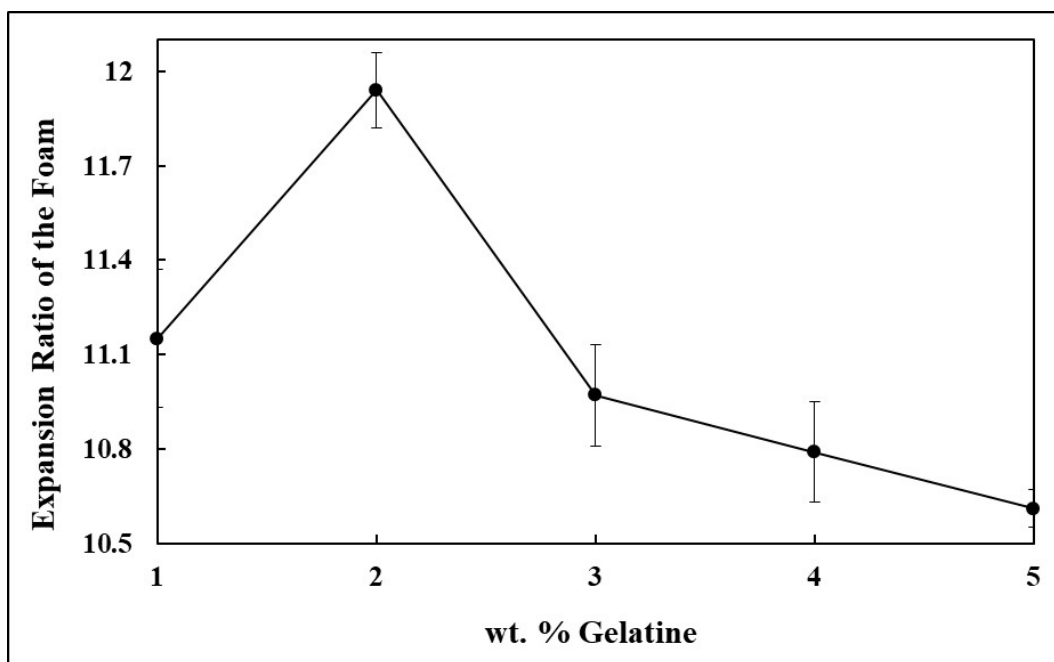

**Figure S1:** Expansion Ratio of Solidified Foam at Varying Gelatine Concentrations. Foam was synthesised with fixed concentrations of hydrogen peroxide (3 wt. %), catalase (0.2 wt. %), and glutaraldehyde (2.5 wt. %) in a 10 mL solution.

| Source of Variation | SS      | df | MS      | F       | P-value     |
|---------------------|---------|----|---------|---------|-------------|
| Between Groups      | 3.18264 | 4  | 0.79566 | 11.5113 | 0.000923739 |
| Within Groups       | 0.6912  | 10 | 0.06912 |         |             |
| Total               | 3.87384 | 14 |         |         |             |

**Table S2:** One-Way ANOVA for Effect of Gelatine Concentration on Mean Expansion Ratio. A significant effect of gelatine concentration (1.0, 2.0, 3.0, 4.0, 5.0) wt. % on the mean foam expansion ratio was observed ( $F(4, 10) = 11.511$ ,  $p = 0.00092$ ,  $p < 0.001$ ). Each group had three replicates ( $n = 3$ ).

| Comparison of Gelatine wt. % | Difference in Means | 95 % Lower CI | 95 % Upper CI | Adjusted p-value | Significance ( $\alpha = 0.05$ ) |
|------------------------------|---------------------|---------------|---------------|------------------|----------------------------------|
| 2.0 - 1.0                    | 0.79                | 0.08          | 1.5           | 0.027            | Yes                              |
| 3.0 - 1.0                    | -0.18               | -0.89         | 0.53          | 0.912            | No                               |
| 4.0 - 1.0                    | -0.36               | -1.07         | 0.35          | 0.487            | No                               |
| 5.0 - 1.0                    | -0.54               | -1.25         | 0.17          | 0.163            | No                               |
| 3.0 - 2.0                    | -0.97               | -1.68         | -0.26         | 0.008            | Yes                              |
| 4.0 - 2.0                    | -1.15               | -1.86         | -0.44         | 0.002            | Yes                              |
| 5.0 - 2.0                    | -1.33               | -2.04         | -0.62         | 0.001            | Yes                              |
| 4.0 - 3.0                    | -0.18               | -0.89         | 0.53          | 0.912            | No                               |
| 5.0 - 3.0                    | -0.36               | -1.07         | 0.35          | 0.487            | No                               |
| 5.0 - 4.0                    | -0.18               | -0.89         | 0.53          | 0.912            | No                               |

**Table S3:** Tukey's HSD Post-Hoc Analysis for Effect of Gelatine Concentration on Expansion Ratio. Pairwise comparisons revealed that 2.0 wt. % gelatine yields significantly higher expansion ratios than 1.0 wt. %, 3.0 wt. %, 4.0 wt. %, and 5.0 wt. % (adjusted  $p < 0.05$ ). All other comparisons were non-significant.

## 1.2 Effect of Gelatine Concentration on the Stability (Volume Retention Ratio $V_{24}/V_0$ ) of Solidified Gelatine-Based Foam:

| wt. % Gelatine | V0-1 | V24-1 | V24/V0 (1) | V0-2 | V24-2 | V24/V0 (2) | V0-3 | V24-3 | V24/V0 (3) | Mean of V24/V0 | SEM of V24/V0 |
|----------------|------|-------|------------|------|-------|------------|------|-------|------------|----------------|---------------|
| 1              | 6.3  | 1.1   | 0.17       | 5.9  | 1.1   | 0.19       | 6.2  | 1     | 0.16       | 0.17           | 0.0088        |
| 2              | 6.5  | 1     | 0.15       | 6.7  | 1     | 0.15       | 6.5  | 1.2   | 0.18       | 0.16           | 0.01          |
| 3              | 6    | 3.9   | 0.65       | 6.2  | 4.1   | 0.66       | 5.9  | 4.2   | 0.71       | 0.67           | 0.0177        |
| 4              | 5.9  | 3.7   | 0.63       | 5.8  | 4.2   | 0.72       | 6.1  | 4.1   | 0.67       | 0.67           | 0.026         |
| 5              | 5.8  | 4.5   | 0.78       | 5.9  | 4.3   | 0.73       | 5.8  | 4.3   | 0.74       | 0.75           | 0.0153        |

**Table S4:** Effect of Gelatine Concentration on the Stability of Solidified Gelatine-Based Foam. Stability is expressed as the volume retention ratio ( $V_{24}/V_0$ ) with fixed concentrations of hydrogen peroxide (3 wt. %), catalase (0.2 wt. %), and glutaraldehyde (2.5 wt. %) in a 10 mL solution. Foam stability is expressed as the volume retention ratio ( $V_{24}/V_0$ ).

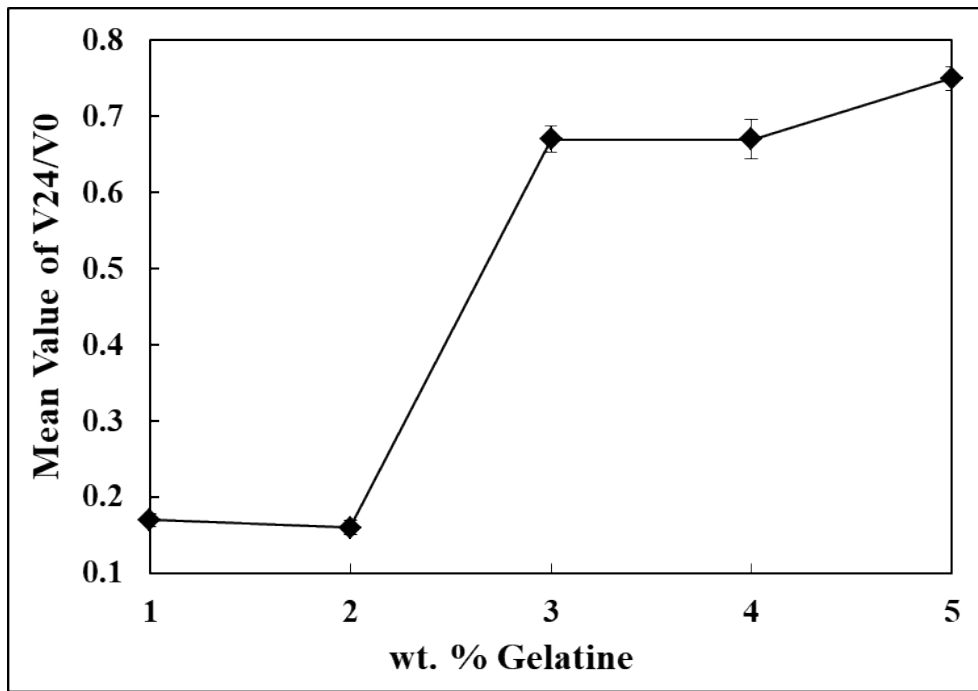

**Figure S2:** Effect of Gelatine Concentration on the Stability of Solidified Gelatine-Based Foam. Stability is expressed as the volume retention ratio ( $V_{24}/V_0$ ) with fixed concentrations of hydrogen peroxide (3 wt. %), catalase (0.2 wt. %), and glutaraldehyde (2.5 wt. %) in a 10 mL solution. Mean volume retention ratios are presented with standard error of the mean (SEM) ( $n = 3$ ).

| Source of Variation | SS     | df | MS      | F     | P-value  |
|---------------------|--------|----|---------|-------|----------|
| Between Groups      | 1.0318 | 4  | 0.25794 | 299.9 | 2.30E-10 |
| Within Groups       | 0.0086 | 10 | 0.00086 |       |          |
| Total               | 1.0404 | 14 |         |       |          |

**Table S5:** One-way ANOVA for Effect of Gelatine Concentration on Mean Volume Retention Ratio. Gelatine concentration (1.0, 2.0, 3.0, 4.0, and 5.0) wt. % had a statistically significant effect on the mean foam volume retention ratio ( $F(4, 10) = 299.9$ ,  $p = 2.3 \times 10^{-10}$ ,  $p < 0.001$ ). Each group had three replicates ( $n = 3$ ).

| Comparison of Gelatine wt. % | Difference in Means | 95 % Lower CI | 95 % Upper CI | Adjusted p-value | Significance ( $\alpha = 0.05$ ) |
|------------------------------|---------------------|---------------|---------------|------------------|----------------------------------|
| 2.0 - 1.0                    | -0.0133             | -0.092        | 0.065         | 0.9785           | No                               |
| 3.0 - 1.0                    | 0.5                 | 0.421         | 0.579         | 0                | Yes                              |
| 4.0 - 1.0                    | 0.5                 | 0.421         | 0.579         | 0                | Yes                              |
| 5.0 - 1.0                    | 0.5767              | 0.498         | 0.655         | 0                | Yes                              |
| 3.0 - 2.0                    | 0.5133              | 0.435         | 0.592         | 0                | Yes                              |
| 4.0 - 2.0                    | 0.5133              | 0.435         | 0.592         | 0                | Yes                              |
| 5.0 - 2.0                    | 0.59                | 0.511         | 0.669         | 0                | Yes                              |
| 4.0 - 3.0                    | 0                   | -0.079        | 0.079         | 1                | No                               |
| 5.0 - 3.0                    | 0.0767              | -0.002        | 0.155         | 0.0574           | No                               |
| 5.0 - 4.0                    | 0.0767              | -0.002        | 0.155         | 0.0574           | No                               |

**Table S6:** Tukey's HSD Post-Hoc Analysis for Effect of Gelatine Concentration on Stability (Volume Retention Ratio V24/V0). Comparisons showed gelatine concentrations of 3.0 wt. %, 4.0 wt. %, and 5.0 wt. % significantly improved foam stability (volume retention) compared to lower concentrations (adjusted  $p < 0.05$ ).

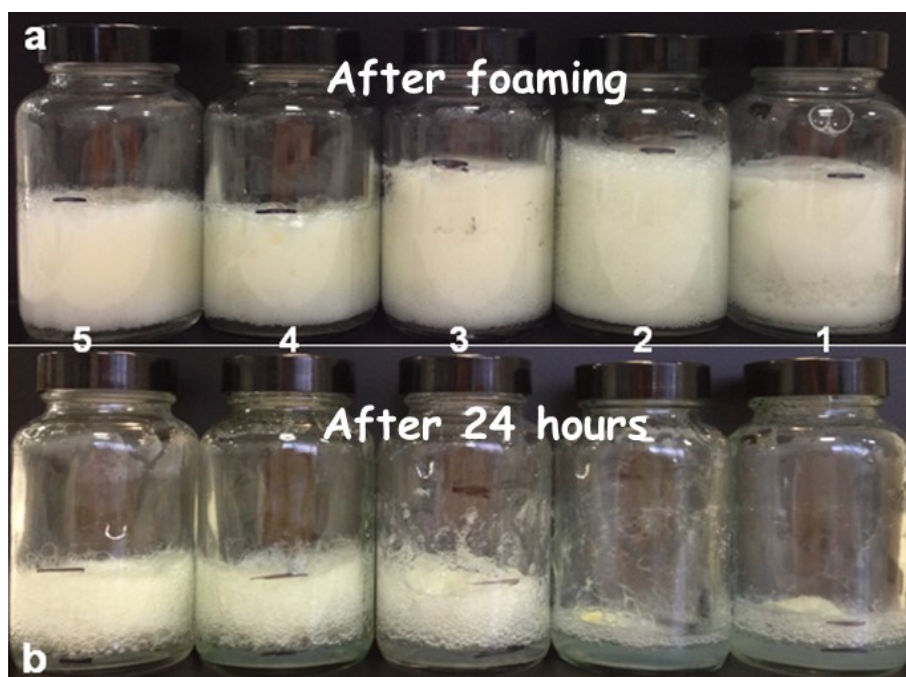

**Figure S3:** Solidified Foams at Varying Gelatine Concentrations. Photographs show foams immediately after formation (a) and after 24 hours (b), illustrating expansion and volume retention. Formed from 2.0 mL catalase/glutaraldehyde (0.2 wt. % Cat, 2.5 wt. % GA) mixed with 8.0 mL gelatine/hydrogen peroxide (3.0 wt. %) at 37 °C; gelatine concentration varied from 1.0 to 5.0 wt. %.

## 2.1 Effect of Hydrogen Peroxide Concentration on the Expansion Ratio of Solidified Gelatine-Based Foam:

| wt. % Hydrogen Peroxide | Vsoln = Lsoln (cm) | Vo-1 = L0-1 (cm) | Vo-2 = L0-2 (cm) | Vo-3 = L0-3 (cm) | Expansion Ratio-1 | Expansion Ratio-2 | Expansion Ratio-3 | Mean Expansion Ratio | SEM  |
|-------------------------|--------------------|------------------|------------------|------------------|-------------------|-------------------|-------------------|----------------------|------|
| 1.2                     | 0.55               | 2.5              | 2.7              | 2.4              | 4.55              | 4.91              | 4.36              | 4.61                 | 0.16 |
| 2.4                     | 0.55               | 3.3              | 3.5              | 3.3              | 6                 | 6.36              | 6                 | 6.12                 | 0.12 |
| 3.6                     | 0.55               | 3.5              | 3.6              | 3.8              | 6.36              | 6.55              | 6.91              | 6.61                 | 0.16 |
| 4.8                     | 0.55               | 4.2              | 4.4              | 4                | 7.64              | 8                 | 7.27              | 7.64                 | 0.21 |
| 6                       | 0.55               | 5.2              | 5.23             | 5.5              | 9.45              | 9.51              | 10                | 9.65                 | 0.17 |

**Table S7:** Observed Volumes, Calculated Expansion Ratios, and Mean Expansion Ratios with Standard Error of the Mean for varying wt. % Hydrogen Peroxide concentrations. Experimental parameters: 10 mL final system volume, 5.0 wt. % gelatine, 0.2 wt. % catalase, 2.5 wt. % glutaraldehyde, 37 °C.

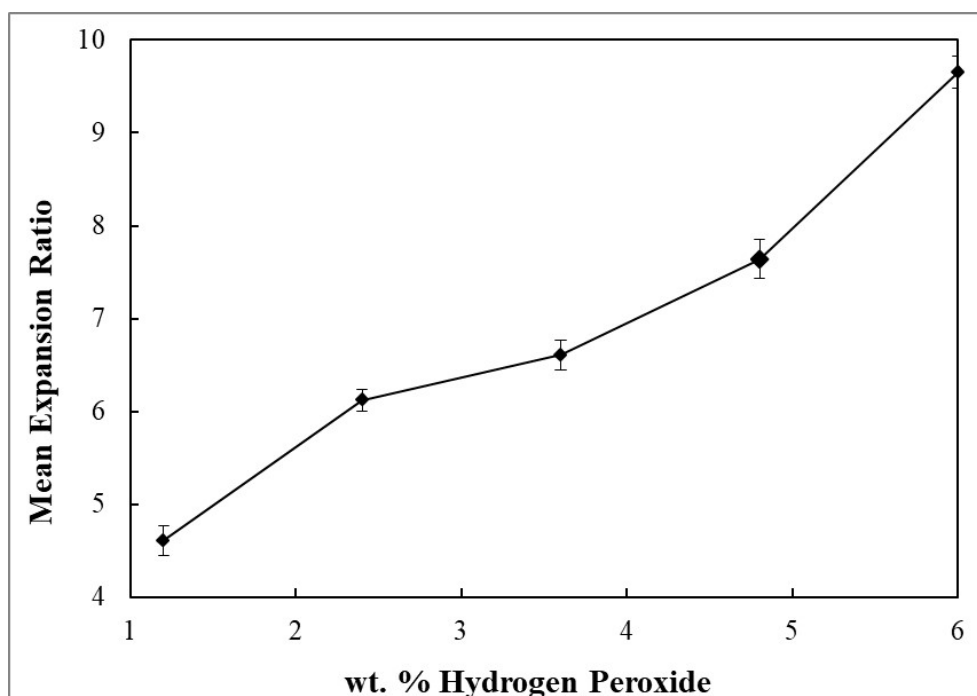

**Figure S4:** Mean Expansion Ratio versus wt. % Hydrogen Peroxide. Error bars represent SEM (n = 3). Fixed gelatine (5.0 wt. %), catalase (0.2 wt. %), glutaraldehyde (2.5 wt. %), 37 °C, 10 mL solution.

| Source of Variation | Sum of Squares (SS) | Degrees of Freedom (df) | Mean Square (MS) | F-statistic | P-value  |
|---------------------|---------------------|-------------------------|------------------|-------------|----------|
| Between Groups      | 42.2229             | 4                       | 10.5557          | 124.6151    | 1.74E-08 |
| Within Groups       | 0.8471              | 10                      | 0.0847           |             |          |
| Total               | 43.07               | 14                      |                  |             |          |

**Table S8:** One-Way ANOVA for the effect of wt. % Hydrogen Peroxide Concentration on Mean Expansion Ratio.  $F(4, 10) = 124.62$ ,  $p < 0.001$ , indicating a highly significant effect of hydrogen peroxide concentration on foam expansion ( $n = 3$  per group).

| Comparison of wt. % H <sub>2</sub> O <sub>2</sub> | Difference in Means | 95% Confidence Interval (Lower) | 95% Confidence Interval (Upper) | Adjusted p-value | Significant ( $\alpha = 0.05$ ) |
|---------------------------------------------------|---------------------|---------------------------------|---------------------------------|------------------|---------------------------------|
| 2.4 – 1.2                                         | 1.5133              | 0.7313                          | 2.2954                          | 0.0006029        | Yes                             |
| 3.6 – 1.2                                         | 2                   | 1.2179                          | 2.7821                          | 0.0000575        | Yes                             |
| 4.8 – 1.2                                         | 3.03                | 2.2479                          | 3.8121                          | 0.0000013        | Yes                             |
| 6.0 – 1.2                                         | 5.0467              | 4.2646                          | 5.8287                          | < 0.0000001      | Yes                             |
| 3.6 – 2.4                                         | 0.4867              | -0.2954                         | 1.2687                          | 0.3117275        | No                              |
| 4.8 – 2.4                                         | 1.5167              | 0.7346                          | 2.2987                          | 0.0005923        | Yes                             |
| 6.0 – 2.4                                         | 3.5333              | 2.7513                          | 4.3154                          | 0.0000003        | Yes                             |
| 4.8 – 3.6                                         | 1.03                | 0.2479                          | 1.8121                          | 0.0100681        | Yes                             |
| 6.0 – 3.6                                         | 3.0467              | 2.2646                          | 3.8287                          | 0.0000012        | Yes                             |
| 6.0 – 4.8                                         | 2.0167              | 1.2346                          | 2.7987                          | 0.0000534        | Yes                             |

**Table S9:** Tukey's HSD Post-Hoc Test Results for Pairwise Comparisons of Mean Expansion Ratios across different wt. % Hydrogen Peroxide concentrations. Notable: No statistically significant difference between 2.4 and 3.6 wt. % hydrogen peroxide (adjusted  $p = 0.311$ ).

## 2.2 Effect of Hydrogen Peroxide Concentration on the Stability (Volume Retention

### Ratio $V_{24}/V_0$ of Solidified Gelatine-Based Foam:

| wt. % Hydrogen Peroxide | $V_{0-1}$ | $V_{0-2}$ | $V_{0-3}$ | $V_{24-1}$ | $V_{24-2}$ | $V_{24-3}$ | $V_{24-1}/V_{0-1}$ | $V_{24-2}/V_{0-2}$ | $V_{24-3}/V_{0-3}$ | Mean $V_{24}/V_0$ | SEM ( $V_{24}/V_0$ ) |
|-------------------------|-----------|-----------|-----------|------------|------------|------------|--------------------|--------------------|--------------------|-------------------|----------------------|
| 1.2                     | 2.5       | 2.7       | 2.4       | 1.7        | 1.8        | 2          | 0.68               | 0.6667             | 0.8333             | 0.7267            | 0.0535               |
| 2.4                     | 3.3       | 3.5       | 3.3       | 2.2        | 2.4        | 2.1        | 0.6667             | 0.6857             | 0.6364             | 0.6629            | 0.0144               |
| 3.6                     | 3.5       | 3.6       | 3.8       | 2.4        | 2.6        | 2.3        | 0.6857             | 0.7222             | 0.6053             | 0.6711            | 0.0345               |
| 4.8                     | 4.2       | 4.4       | 4         | 2.1        | 2.4        | 2.5        | 0.5                | 0.5455             | 0.625              | 0.5568            | 0.0365               |
| 6                       | 5.2       | 5.23      | 5.5       | 1          | 1.2        | 0.98       | 0.1923             | 0.2294             | 0.1782             | 0.2               | 0.0153               |

**Table S10:** Initial foam volume ( $V_0$ ) and foam volume after 24 hours ( $V_{24}$ ) for triplicate experiments at varying hydrogen peroxide concentrations, along with individual mean volume retention ratios ( $V_{24}/V_0$ ) and standard error of the mean (SEM). Experimental parameters: 10 mL final system volume, 5.0 wt. % gelatine, 0.2 wt. % catalase, 2.5 wt. % glutaraldehyde, 37 °C.

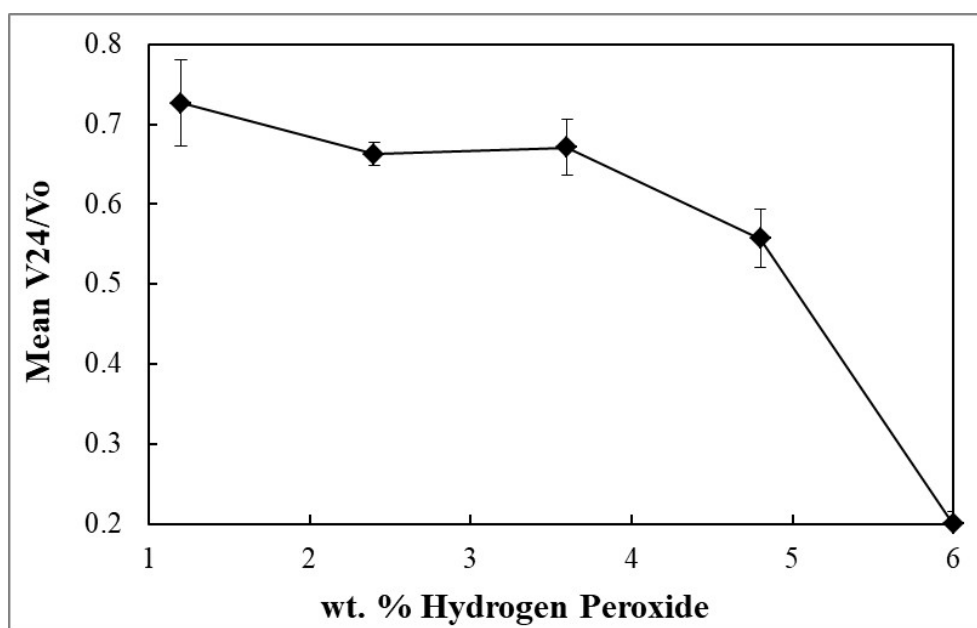

**Figure S5:** Mean volume retention ratio ( $V_{24}/V_0$ ) versus wt. % Hydrogen Peroxide. Error bars represent SEM ( $n = 3$ ). Fixed gelatine (5.0 wt. %), catalase (0.2 wt. %), glutaraldehyde (2.5 wt. %), 37 °C, 10 mL solution.

| Source of Variation   | Sum of Squares (SS) | Degrees of Freedom (df) | Mean Square (MS) | F-statistic | P-value               |
|-----------------------|---------------------|-------------------------|------------------|-------------|-----------------------|
| Between Groups        | 0.5408              | 4                       | 0.1352           | 38.6686     | $4.69 \times 10^{-6}$ |
| Within Groups (Error) | 0.0349              | 10                      | 0.00349          |             |                       |
| Total                 | 0.5757              | 14                      |                  |             |                       |

**Table S11:** One-Way ANOVA for the effect of wt. % Hydrogen Peroxide Concentration on Foam Stability (Mean Volume Retention Ratio).  $F(4, 10) = 38.6686$ ,  $p = 4.69 \times 10^{-6}$  ( $p < 0.001$ ), indicating a highly significant effect of hydrogen peroxide concentration on volume retention ( $n = 3$  per group).

| Comparison of wt.% Hydrogen Peroxide | Difference in Means | 95% Lower CI | 95% Upper CI | Adjusted p-value | Significance ( $\alpha = 0.05$ ) |
|--------------------------------------|---------------------|--------------|--------------|------------------|----------------------------------|
| 1.2 – 2.4                            | -0.0637             | -0.2230      | 0.0956       | 0.6858           | No                               |
| 1.2 – 3.6                            | -0.0556             | -0.2149      | 0.1037       | 0.7768           | No                               |
| 1.2 – 4.8                            | -0.1698             | -0.3289      | -0.0107      | 0.0351           | Yes                              |
| 1.2 – 6.0                            | -0.5267             | -0.6858      | -0.3675      | < 0.0001         | Yes                              |
| 2.4 – 3.6                            | 0.0081              | -0.1510      | 0.1673       | 0.9998           | No                               |
| 2.4 – 4.8                            | -0.1061             | -0.2653      | 0.0531       | 0.255            | No                               |
| 2.4 – 6.0                            | -0.4630             | -0.6222      | -0.3039      | < 0.0001         | Yes                              |
| 3.6 – 4.8                            | -0.1142             | -0.2734      | 0.0449       | 0.2016           | No                               |
| 3.6 – 6.0                            | -0.4711             | -0.6303      | -0.3119      | < 0.0001         | Yes                              |
| 4.8 – 6.0                            | -0.3569             | -0.5161      | -0.1977      | 0.0002           | Yes                              |

**Table S12:** Tukey's HSD Post-Hoc Test Results for Pairwise Comparisons of Mean Volume Retention Ratios ( $V_{24}/V_0$ ) across different wt. % Hydrogen Peroxide concentrations. Notable: 6.0 wt. % hydrogen peroxide was significantly lower than all other concentrations; 1.2 wt. % vs 4.8 wt. % hydrogen peroxide also showed a significant difference. No significant differences among lower concentrations (1.2, 2.4, 3.6) or between (2.4, 3.6, 4.8).

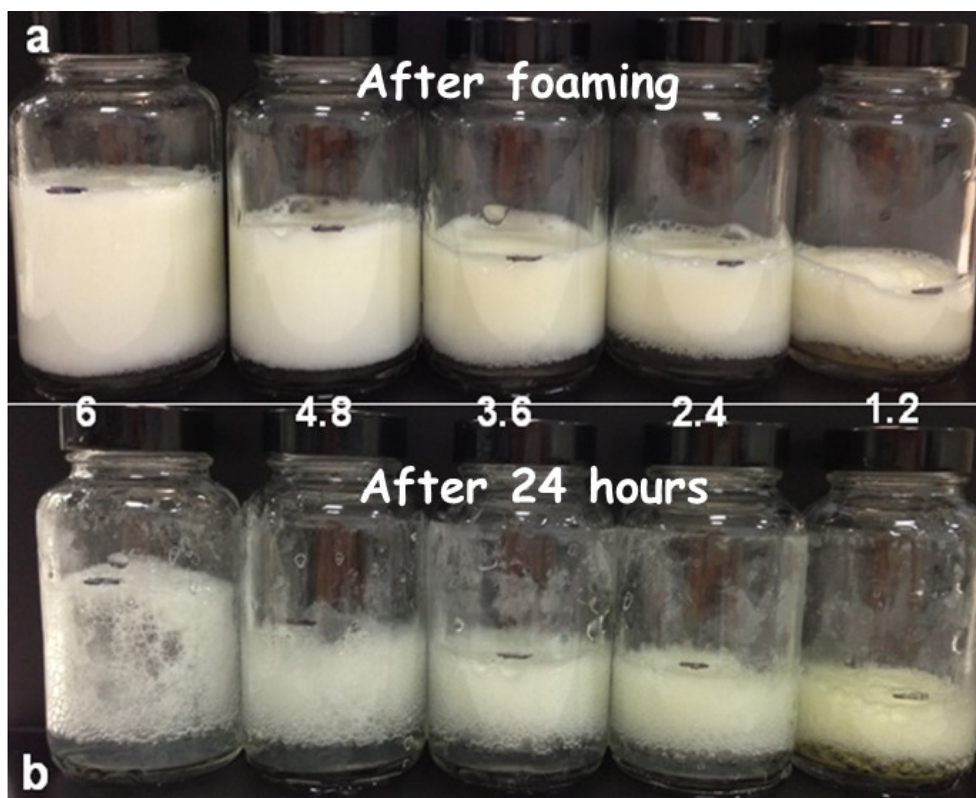

**Figure S6:** Visual representation of solidified foams formed at varying wt. % Hydrogen Peroxide concentrations, comparing initial state (a) and after 24 hours (b). Fixed gelatine (5.0 wt. %), catalase (0.2 wt. %), glutaraldehyde (2.5 wt. %), 37 °C.

### 3.1 Effect of Catalase Concentration on the Expansion Ratio of Solidified Gelatine-Based Foam:

| wt. % Catalase | Vsoln = Lsoln | Vfoam-1 | Vfoam-2 | Vfoam-3 | Expansion Ratio-1 | Expansion Ratio-2 | Expansion Ratio-3 | Mean Expansion Ratio | SEM    |
|----------------|---------------|---------|---------|---------|-------------------|-------------------|-------------------|----------------------|--------|
| 0.05           | 0.55          | 2       | 2.2     | 1.8     | 3.64              | 4                 | 3.27              | 3.64                 | 0.2099 |
| 0.1            | 0.55          | 4.1     | 4.5     | 4.2     | 7.45              | 8.2               | 7.64              | 7.76                 | 0.2251 |
| 0.2            | 0.55          | 5       | 5       | 4.9     | 9.1               | 9.1               | 8.9               | 9.03                 | 0.0667 |
| 0.3            | 0.55          | 4.5     | 4.9     | 4.7     | 8.2               | 8.9               | 8.54              | 8.55                 | 0.2021 |
| 0.4            | 0.55          | 4.5     | 4.3     | 4.8     | 8.2               | 7.82              | 8.73              | 8.24                 | 0.2642 |

**Table S13:** Effect of varying catalase concentrations on foam expansion ratio. The raw data includes solution volume (Vsoln), foam volumes (Vfoam), calculated expansion ratios, mean expansion ratios, and standard error of the mean (SEM) for each catalase concentration tested. The experimental: final volume of 10 mL, gelatine concentration of 5 wt. %, hydrogen peroxide concentration of 3.6 wt. %, glutaraldehyde (GA) concentration of 2.5 wt. %, and temperature of 37 °C, with 3 replicates for each concentration.

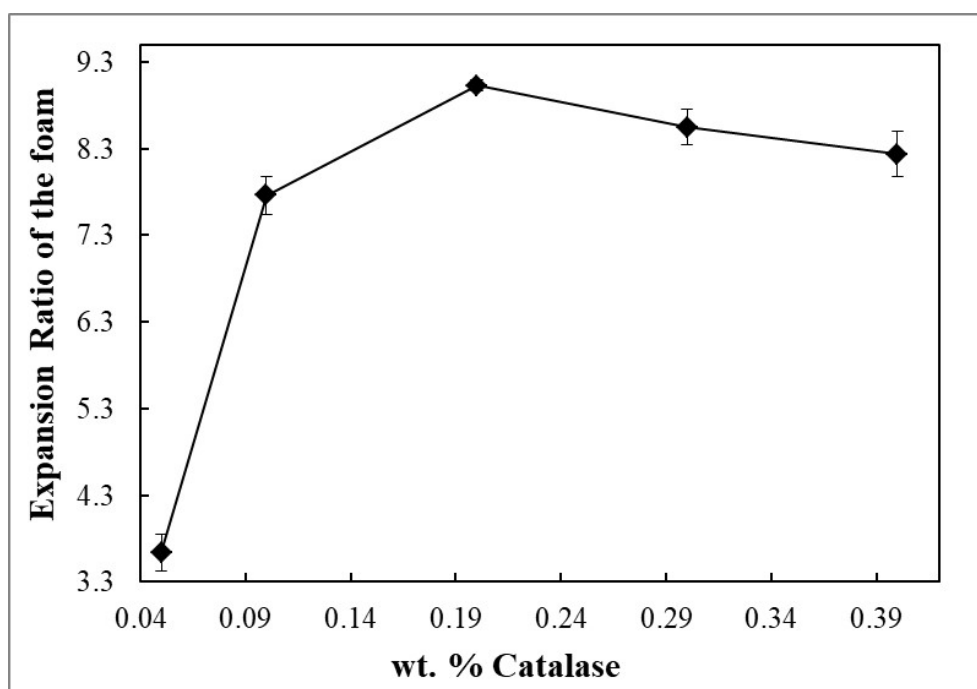

**Figure S7:** Effect of varying catalase concentrations on the mean expansion ratio of the foam with standard error bars as a function of catalase concentration. The experimental conditions: final volume of 10 mL, gelatine concentration of 5 wt. %, hydrogen peroxide concentration of 3.6 wt. %, glutaraldehyde (GA) concentration of 2.5 wt. %, and temperature of 37 °C, with 3 replicates for each concentration.

| Source   | Sum of Squares | df | F        | p-value               |
|----------|----------------|----|----------|-----------------------|
| Catalase | 56.9677        | 4  | 113.0252 | $2.80 \times 10^{-8}$ |
| Residual | 1.2601         | 10 | —        | —                     |

**Table S14:** One-Way ANOVA for the effect of wt. % Catalase Concentration on Mean Expansion Ratio.  $F(4, 10) = 113.03$ ,  $p < 2.80 \times 10^{-8}$ , indicating a highly significant effect of catalase concentration on foam expansion ( $n = 3$  per group).

| Comparison of wt.% Catalase | Difference in Means | 95% Lower CI | 95% Upper CI | Adjusted p-value | Significance ( $\alpha = 0.05$ ) |
|-----------------------------|---------------------|--------------|--------------|------------------|----------------------------------|
| 0.05 – 0.10                 | -4.12               | -4.87        | -3.37        | < 0.0001         | Yes                              |
| 0.05 – 0.20                 | -5.39               | -6.14        | -4.64        | < 0.0001         | Yes                              |
| 0.05 – 0.30                 | -4.91               | -5.66        | -4.16        | < 0.0001         | Yes                              |
| 0.05 – 0.40                 | -4.60               | -5.35        | -3.85        | < 0.0001         | Yes                              |
| 0.10 – 0.20                 | -1.27               | -2.02        | -0.52        | 0.0001           | Yes                              |
| 0.10 – 0.30                 | -0.79               | -1.54        | -0.04        | 0.06             | No                               |
| 0.10 – 0.40                 | -0.48               | -1.23        | 0.27         | 0.356            | No                               |
| 0.20 – 0.30                 | 0.48                | -0.27        | 1.23         | 0.356            | No                               |
| 0.20 – 0.40                 | 0.79                | 0.04         | 1.54         | 0.06             | No                               |
| 0.30 – 0.40                 | 0.31                | -0.44        | 1.06         | 0.74             | No                               |

**Table S15:** Tukey's HSD Post-Hoc Test Results for Pairwise Comparisons of Mean Expansion Ratios across different wt. % Catalase concentrations. Notable: No statistically significant difference between (0.2, 0.3, and 0.4) wt. % catalase (adjusted  $p > 0.05$ ).

### 3.2 Effect of Catalase Concentration on the Stability (Volume Retention Ratio $V_{24}/V_0$ ) of Solidified Gelatine-Based Foam:

| wt. % Catalase | $V_{0-1}$ | $V_{0-2}$ | $V_{0-3}$ | $V_{24-1}$ | $V_{24-2}$ | $V_{24-3}$ | $V_{24-1}/V_{0-1}$ | $V_{24-2}/V_{0-2}$ | $V_{24-3}/V_{0-3}$ | Mean $V_{24}/V_0$ | SEM ( $V_{24}/V_0$ ) |
|----------------|-----------|-----------|-----------|------------|------------|------------|--------------------|--------------------|--------------------|-------------------|----------------------|
| 0.05           | 2         | 2.1       | 2.3       | 0.7        | 0.9        | 1          | 0.35               | 0.429              | 0.435              | 0.404             | 0.027                |
| 0.1            | 4         | 4.5       | 4.3       | 2          | 2.2        | 2.1        | 0.5                | 0.489              | 0.488              | 0.492             | 0.004                |
| 0.2            | 5         | 4.9       | 5.4       | 2.5        | 2.8        | 2.9        | 0.5                | 0.571              | 0.537              | 0.536             | 0.021                |
| 0.3            | 4.5       | 5.1       | 4.9       | 2.3        | 2.7        | 2.2        | 0.511              | 0.529              | 0.449              | 0.497             | 0.024                |
| 0.4            | 4.5       | 4.6       | 4.8       | 2.5        | 2.4        | 2.4        | 0.556              | 0.522              | 0.5                | 0.526             | 0.016                |

**Table S16:** Effect of Catalase Concentration on Foam Stability. Stability is expressed as the volume retention ratio ( $V_{24}/V_0$ ) at fixed concentrations of gelatine (5.0 wt. %), hydrogen peroxide (3.6 wt. %), and glutaraldehyde (2.5 wt. %), in a 10 mL solution. Mean volume retention ratios are presented with standard error of the mean (SEM) ( $n = 3$ ).

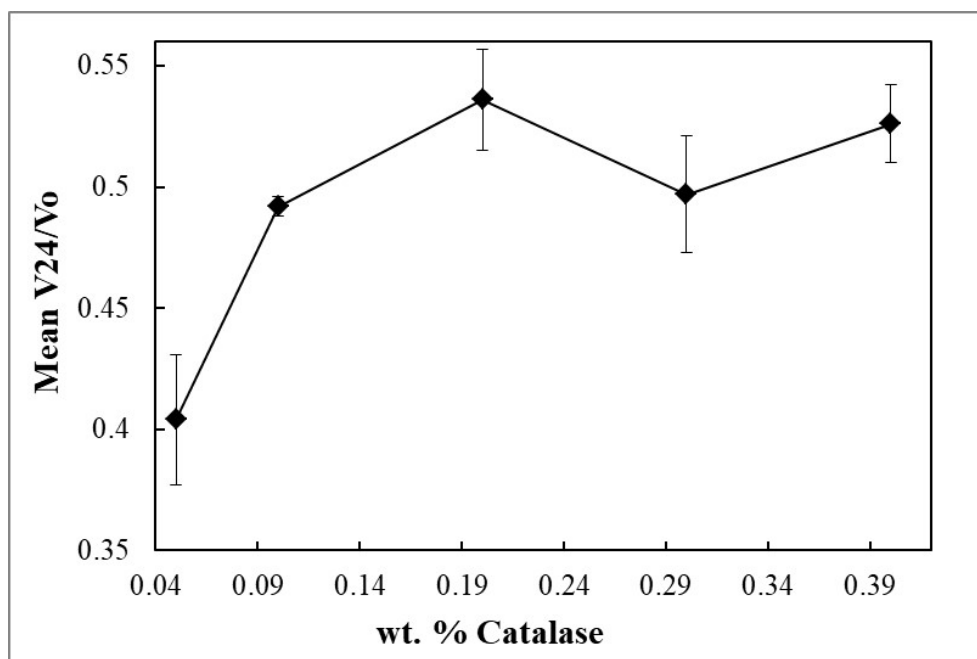

**Figure S8:** Effect of Catalase Concentration on the Stability of Solidified Gelatine-Based Foam. Stability is expressed as the volume retention ratio ( $V_{24}/V_0$ ) at fixed concentrations of gelatine (5.0 wt. %), hydrogen peroxide (3.6 wt. %), and glutaraldehyde (2.5 wt. %), in a 10

mL solution. Mean volume retention ratios are presented with standard error of the mean (SEM) (n = 3).

| Source   | Sum of Squares | df | Mean Square | F      | p-value |
|----------|----------------|----|-------------|--------|---------|
| Catalase | 0.0322         | 4  | 0.0081      | 6.5845 | 0.0073  |
| Residual | 0.0122         | 10 | 0.0012      | —      | —       |

**Table S17:** One-Way ANOVA for the effect of wt. % Catalase Concentration on Stability (Volume Retention Ratio V24/V0). F(4, 10)= 6.5845, p = 0.0073, indicating a significant effect of catalase concentration on foam stability (n = 3 per group).

| Comparison of wt. % Catalase | Difference in Means | 95 % Lower CI | 95 % Upper CI | Adjusted p-value | Significance ( $\alpha = 0.05$ ) |
|------------------------------|---------------------|---------------|---------------|------------------|----------------------------------|
| 0.05 vs. 0.10                | 0.0877              | -0.0063       | 0.1816        | 0.0703           | No                               |
| 0.05 vs. 0.20                | 0.1313              | 0.0374        | 0.2253        | 0.0068           | Yes                              |
| 0.05 vs. 0.30                | 0.0917              | -0.0023       | 0.1856        | 0.0566           | No                               |
| 0.05 vs. 0.40                | 0.1213              | 0.0274        | 0.2153        | 0.0114           | Yes                              |
| 0.10 vs. 0.20                | 0.0437              | -0.0503       | 0.1376        | 0.568            | No                               |
| 0.10 vs. 0.30                | 0.004               | -0.09         | 0.098         | 0.9999           | No                               |
| 0.10 vs. 0.40                | 0.0337              | -0.0603       | 0.1276        | 0.7627           | No                               |
| 0.20 vs. 0.30                | -0.0397             | -0.1336       | 0.0543        | 0.6471           | No                               |
| 0.20 vs. 0.40                | -0.01               | -0.104        | 0.084         | 0.9962           | No                               |
| 0.30 vs. 0.40                | 0.0297              | -0.0643       | 0.1236        | 0.832            | No                               |

**Table S18:** Tukey’s HSD Post-Hoc Test Results for Pairwise Comparisons of Stability (Volume Retention Ratio V24/V0) across different wt. % Catalase concentrations. Notably, there is a statistically significant difference between 0.05 wt. % catalase and both 0.20 wt. % (p = 0.0068) and 0.40 wt. % (p = 0.0114) concentrations. No other pairwise comparisons were statistically significant (adjusted p > 0.05).

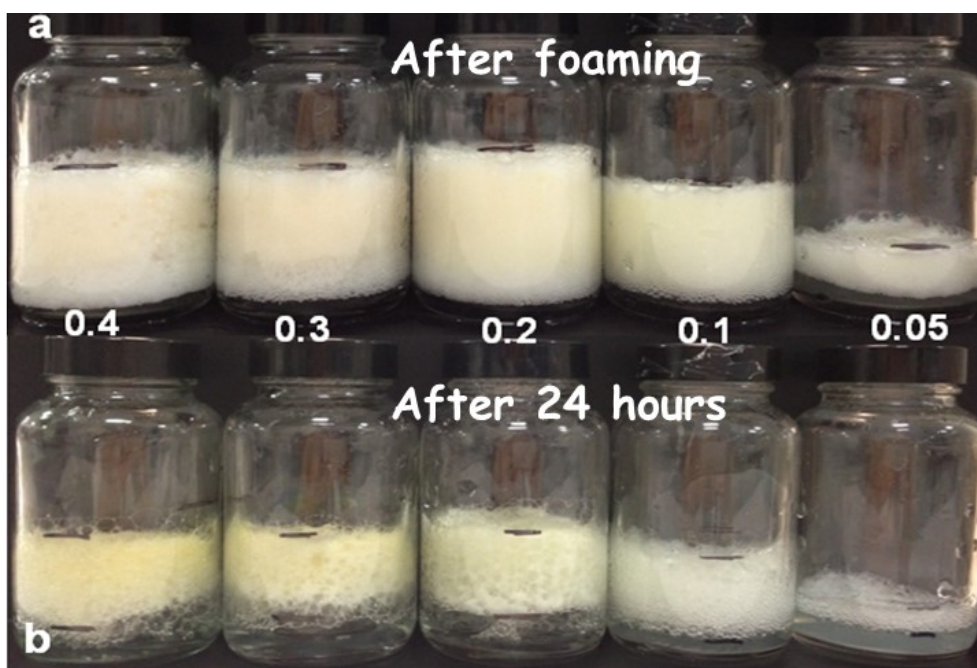

**Figure S9:** Visual representation of solidified foams formed at varying wt. % Catalase concentrations, comparing initial state (a) and after 24 hours (b). Fixed gelatine (5.0 wt. %), hydrogen peroxide (3.6 wt. %), glutaraldehyde (2.5 wt. %), 37 °C.

#### 4.1 Effect of Glutaraldehyde Concentration on the Expansion Ratio of Solidified Gelatine-Based Foam:

| wt. % GA | Vsoln (L) | Vfoam-1 (L) | Vfoam-2 (L) | Vfoam-3 (L) | ER-1 | ER-2 | ER-3 | Mean ER | SEM  |
|----------|-----------|-------------|-------------|-------------|------|------|------|---------|------|
| 1        | 0.55      | 4.5         | 4.3         | 4.8         | 8.18 | 7.82 | 8.73 | 8.24    | 0.27 |
| 2        | 0.55      | 4           | 4.2         | 3.9         | 7.27 | 7.64 | 7.09 | 7.33    | 0.16 |
| 3        | 0.55      | 3.6         | 3.8         | 3.7         | 6.55 | 6.91 | 6.73 | 6.73    | 0.1  |
| 4        | 0.55      | 2           | 2.4         | 2.1         | 3.64 | 4.36 | 3.82 | 3.94    | 0.22 |
| 5        | 0.55      | 2.2         | 2.2         | 2.4         | 4    | 4    | 4.36 | 4.12    | 0.12 |

**Table S19:** Effect of varying glutaraldehyde (GA) concentrations on foam expansion ratio. The raw data for solution volume ( $V_{\text{soln}}$ ), foam volumes ( $V_{\text{foam}}$ ), calculated expansion ratios, mean expansion ratios, and standard error of the mean (SEM) for each glutaraldehyde concentration tested. The experimental conditions were as follows: final volume of 10 mL, gelatine concentration of 5 wt. %, hydrogen peroxide concentration of 3.6 wt. %, catalase concentration of 0.2 wt. %, and temperature of 37 °C, with 3 replicates for each concentration.

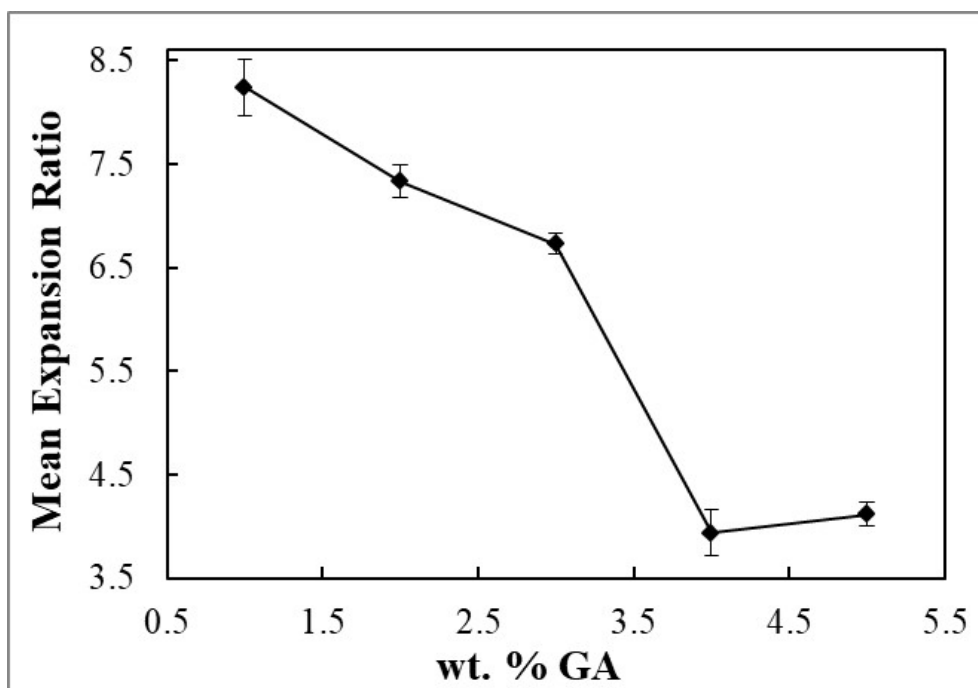

**Figure S10:** Effect of varying glutaraldehyde (GA) concentrations on the mean expansion ratio of the foam with standard error bars as a function of glutaraldehyde concentration. The experimental conditions: final volume of 10 mL, gelatine concentration of 5 wt. %, hydrogen peroxide concentration of 3.6 wt. %, catalase concentration of 0.2 wt. %, and temperature of 37 °C, with 3 replicates for each concentration.

| Source of Variation | Sum of Squares (SS) | Degrees of Freedom (df) | Mean Square (MS) | F-statistic | p-value              |
|---------------------|---------------------|-------------------------|------------------|-------------|----------------------|
| Between Groups      | 13.69               | 4                       | 3.42             | 112.16      | $2.9 \times 10^{-8}$ |
| Within Groups       | 0.31                | 10                      | 0.03             |             |                      |
| Total               | 14                  | 14                      |                  |             |                      |

**Table S20:** One-way ANOVA for the effect of wt. % Glutaraldehyde Concentration on Mean Expansion Ratio.  $F(4, 10) = 111.6$ ,  $p = 2.97 \times 10^{-8}$ , indicating a highly significant effect of glutaraldehyde concentration on foam expansion ( $n = 3$  per group).

| Comparison of wt.% GA | Difference in Means | 95% Lower CI | 95% Upper CI | Adjusted p-value | Significance ( $\alpha = 0.05$ ) |
|-----------------------|---------------------|--------------|--------------|------------------|----------------------------------|
| 1 – 2                 | -0.91               | -1.764       | -0.056       | 0.0357           | Yes                              |
| 1 – 3                 | -1.51               | -2.367       | -0.660       | 0.0012           | Yes                              |
| 1 – 4                 | -4.30               | -5.157       | -3.450       | < 0.0001         | Yes                              |
| 1 – 5                 | -4.12               | -4.977       | -3.270       | < 0.0001         | Yes                              |
| 2 – 3                 | -0.60               | -1.457       | 0.25         | 0.2137           | No                               |
| 2 – 4                 | -3.39               | -4.247       | -2.540       | < 0.0001         | Yes                              |
| 2 – 5                 | -3.21               | -4.067       | -2.360       | < 0.0001         | Yes                              |
| 3 – 4                 | -2.79               | -3.644       | -1.936       | < 0.0001         | Yes                              |
| 3 – 5                 | -2.61               | -3.464       | -1.756       | < 0.0001         | Yes                              |
| 4 – 5                 | 0.18                | -0.674       | 1.034        | 0.9533           | No                               |

**Table S21:** Tukey’s HSD Post-Hoc Test Results for Pairwise Comparisons of Mean Expansion Ratios across different wt. % Glutaraldehyde concentrations. Notable: No statistically significant difference between 2.0 and 3.0 wt. %, and 4.0 and 5.0 wt. % glutaraldehyde (adjusted  $p > 0.05$ ).

#### 4.2 Effect of Glutaraldehyde Concentration on the Stability (Volume Retention Ratio $V_{24}/V_0$ ) of Solidified Gelatine-Based Foam:

| wt. % GA | $V_{0-1}$ | $V_{0-2}$ | $V_{0-3}$ | $V_{24-1}$ | $V_{24-2}$ | $V_{24-3}$ | $V_{24-1}/V_{0-1}$ | $V_{24-2}/V_{0-2}$ | $V_{24-3}/V_{0-3}$ | Mean $V_{24}/V_0$ | SEM ( $V_{24}/V_0$ ) |
|----------|-----------|-----------|-----------|------------|------------|------------|--------------------|--------------------|--------------------|-------------------|----------------------|
| 1        | 4.5       | 4.3       | 4.6       | 2          | 2.1        | 1.9        | 0.44               | 0.49               | 0.41               | 0.45              | 0.02                 |
| 2        | 4         | 4.2       | 3.8       | 1.8        | 2.2        | 2          | 0.45               | 0.52               | 0.53               | 0.5               | 0.03                 |
| 3        | 3.6       | 3.8       | 3.5       | 2.2        | 2.1        | 1.8        | 0.61               | 0.55               | 0.51               | 0.56              | 0.03                 |
| 4        | 2.2       | 2.3       | 2.1       | 1.2        | 1.1        | 1.2        | 0.55               | 0.48               | 0.57               | 0.53              | 0.03                 |
| 5        | 2.2       | 2.2       | 2         | 1.2        | 0.9        | 1.1        | 0.55               | 0.41               | 0.55               | 0.5               | 0.05                 |

**Table S22:** Effect of varying glutaraldehyde (GA) concentrations on foam stability ratio. The raw data for foam stability  $V_{24}/V_0$ , mean stability ratio, and standard error of the mean (SEM) for each glutaraldehyde concentration tested. The experimental conditions were as follows: final volume of 10 mL, gelatine concentration of 5.0 wt. %, hydrogen peroxide concentration of 3.6 wt. %, catalase concentration of 0.2 wt. %, and temperature of 37 °C, with 3 replicates for each concentration.

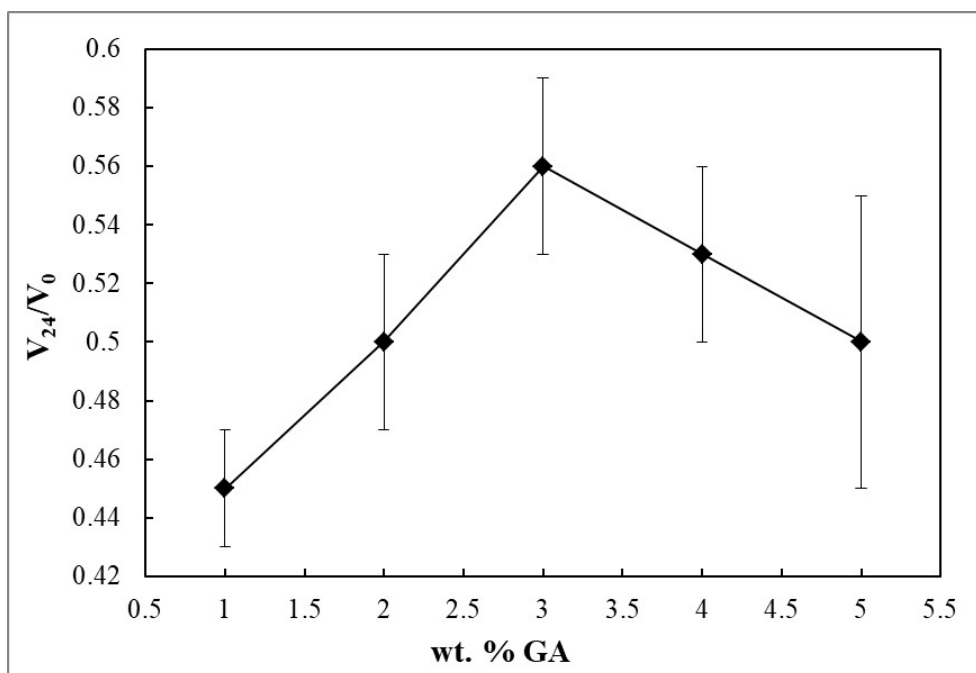

**Figure S11:** Effect of varying glutaraldehyde (GA) concentrations on the mean foam stability ratio ( $V_{24}/V_0$ ). Error bars denote the standard error of the mean (SEM). The experiment was conducted at a fixed concentration of 5.0 wt. % gelatine, 3.6 wt. % hydrogen peroxide, and 0.2 wt. % catalase at 37 °C, with three replicates for each concentration.

| Source of variation | SS      | df | MS      | F    | p-value |
|---------------------|---------|----|---------|------|---------|
| Between groups      | 0.02057 | 4  | 0.00514 | 1.73 | 0.219   |
| Within groups       | 0.02967 | 10 | 0.00297 |      |         |
| Total               | 0.05024 | 14 |         |      |         |

**Table S23:** One-way ANOVA for the effect of wt. % Glutaraldehyde Concentration on Mean Foam Stability Ratio ( $V_{24}/V_0$ ).  $F(4, 10) = 1.73$ ,  $p = 0.219$ , indicating the effect of glutaraldehyde concentration on foam stability was not statistically significant at the  $\alpha = 0.05$  level ( $n = 3$  per group).

| Comparison of wt.% GA | Difference in Means | 95% Lower CI | 95% Upper CI | Adjusted p-value | Significance |
|-----------------------|---------------------|--------------|--------------|------------------|--------------|
| 1 – 2                 | 0.0533              | -0.0930      | 0.1997       | 0.7521           | No           |
| 1 – 3                 | 0.11                | -0.0364      | 0.2564       | 0.173            | No           |
| 1 – 4                 | 0.0867              | -0.0597      | 0.233        | 0.3539           | No           |
| 1 – 5                 | 0.0567              | -0.0897      | 0.203        | 0.7116           | No           |
| 2 – 3                 | 0.0567              | -0.0897      | 0.203        | 0.7116           | No           |
| 2 – 4                 | 0.0333              | -0.1130      | 0.1797       | 0.9393           | No           |
| 2 – 5                 | 0.0033              | -0.1430      | 0.1497       | 1                | No           |
| 3 – 4                 | -0.0233             | -0.1697      | 0.123        | 0.9827           | No           |
| 3 – 5                 | -0.0533             | -0.1997      | 0.093        | 0.7521           | No           |
| 4 – 5                 | -0.0300             | -0.1764      | 0.1164       | 0.9576           | No           |

**Table S24:** Tukey’s HSD Post-Hoc Test Results for Pairwise Comparisons of Mean Foam Stability Ratios ( $V_{24}/V_0$ ) across different wt. % Glutaraldehyde concentrations. The stability difference between 3.0 wt. % GA (highest mean stability) and 1.0 wt. % GA (lowest mean stability) had the smallest adjusted p-value (0.173), but no comparisons were found to be statistically significant at the  $\alpha = 0.05$  level (all adjusted  $p > 0.05$ ).

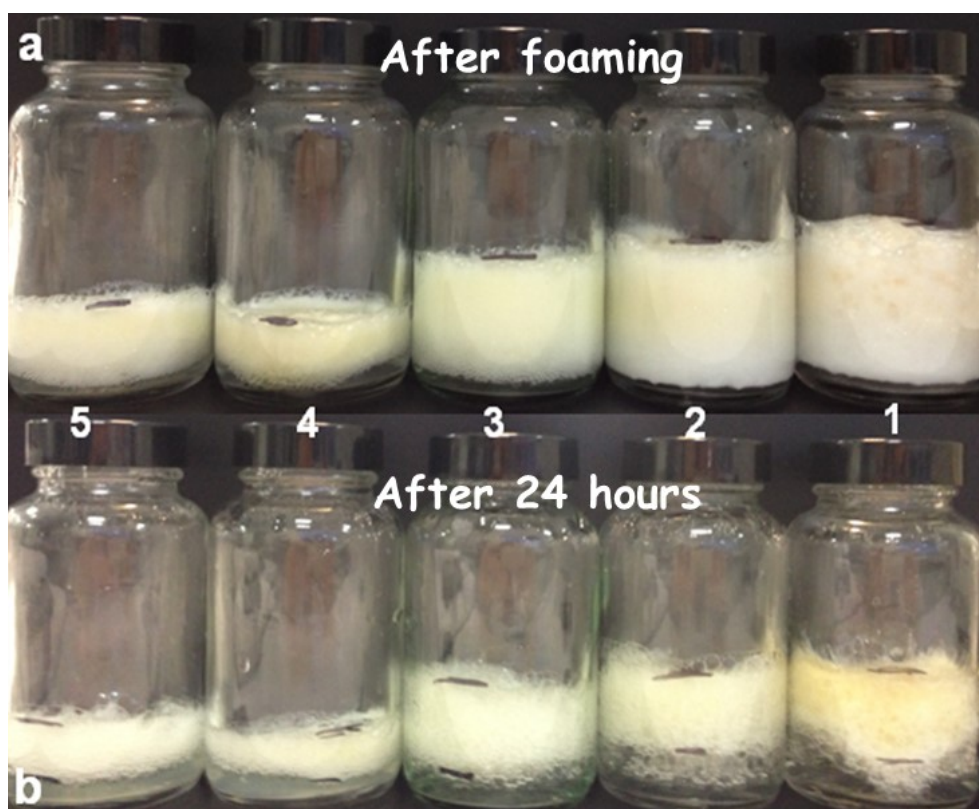

**Figure S12:** Visual representation of solidified foams formed at varying wt. % Glutaraldehyde concentrations, comparing the initial state (a) and after 24 hours (b). The experimental conditions were as follows: fixed gelatine (5.0 wt. %), hydrogen peroxide (3.6 wt. %), catalase (0.2 wt. %), and a temperature of 37 °C.
