# Supplementary material for: Gelatine-based foams produced by enzymatic foaming: formulation–structure relationships affecting expansion and stability
Source: RSC Adv. 2026 Mar 2;16(13):11944–54. doi: 10.1039/d6ra00030d (PMC12951601; doi:10.1039/d6ra00030d)
Supplement: RA-016-D6RA00030D-s002 [file RA-016-D6RA00030D-s002.xlsx]

## Sheet: Gel-Expansion
	wt. % Gelatine	Vsoln = Lsoln	Vfoam-1	Vfoam-2	Vfoam-3	Expansion Ratio-1	Expansion Ratio-2	Expansion Ratio-3	Mean Expansion Ratio	SEM			Source of Variation	SS	df	MS	F	P-value
	1	0.55	6.3	5.9	6.2	11.45	10.73	11.27	11.15	0.22			Between Groups	3.18264	4	0.79566	11.5113	0.000923739
	2	0.55	6.5	6.7	6.5	11.82	12.18	11.82	11.94	0.12			Within Groups	0.6912	10	0.06912
	3	0.55	6	6.2	5.9	10.91	11.27	10.73	10.97	0.16
	4	0.55	5.9	5.8	6.1	10.73	10.55	11.09	10.79	0.16			Total	3.87384	14
	5	0.55	5.8	5.9	5.8	10.55	10.73	10.55	10.61	0.06
													Comparison of Gelatine wt. %	Difference in Means	95 % Lower CI	95 % Upper CI	Adjusted p-value	Significance (α = 0.05)
													2.0 - 1.0	0.79	0.08	1.5	0.027	Yes
													3.0 - 1.0	-0.18	-0.89	0.53	0.912	No
													4.0 - 1.0	-0.36	-1.07	0.35	0.487	No
													5.0 - 1.0	-0.54	-1.25	0.17	0.163	No
													3.0 - 2.0	-0.97	-1.68	-0.26	0.008	Yes
													4.0 - 2.0	-1.15	-1.86	-0.44	0.002	Yes
													5.0 - 2.0	-1.33	-2.04	-0.62	0.001	Yes
													4.0 - 3.0	-0.18	-0.89	0.53	0.912	No
													5.0 - 3.0	-0.36	-1.07	0.35	0.487	No
													5.0 - 4.0	-0.18	-0.89	0.53	0.912	No

## Sheet: Gel-Stability
	wt. % Gelatine	V0-1	V24-1	V24/ V0 (1)	V0-2	V24-2	V24 / V0 (2)	V0-3	V24-3	V24/ V0 (3)	Mean of V24/V0	SEM of V24/V0			Source of Variation	SS	df	MS	F	P-value
	1	6.3	1.1	0.17	5.9	1.1	0.19	6.2	1	0.16	0.17	0.0088			Between Groups	1.0318	4	0.25794	299.9	2.3e-10
	2	6.5	1	0.15	6.7	1	0.15	6.5	1.2	0.18	0.16	0.01			Within Groups	0.0086	10	0.00086
	3	6	3.9	0.65	6.2	4.1	0.66	5.9	4.2	0.71	0.67	0.0177			Total	1.0404	14
	4	5.9	3.7	0.63	5.8	4.2	0.72	6.1	4.1	0.67	0.67	0.026
	5	5.8	4.5	0.78	5.9	4.3	0.73	5.8	4.3	0.74	0.75	0.0153
												Comparison of Gelatine wt. %	Difference in Means	95 % Lower CI	95 % Upper CI	Adjusted p-value	Significance (α = 0.05)
												2.0 - 1.0	-0.0133	-0.092	0.065	0.9785	No
												3.0 - 1.0	0.5	0.421	0.579	0	Yes
												4.0 - 1.0	0.5	0.421	0.579	0	Yes
												5.0 - 1.0	0.5767	0.498	0.655	0	Yes
												3.0 - 2.0	0.5133	0.435	0.592	0	Yes
												4.0 - 2.0	0.5133	0.435	0.592	0	Yes
												5.0 - 2.0	0.59	0.511	0.669	0	Yes
												4.0 - 3.0	0	-0.079	0.079	1	No
												5.0 - 3.0	0.0767	-0.002	0.155	0.0574	No
												5.0 - 4.0	0.0767	-0.002	0.155	0.0574	No

## Sheet: Peroxide-Expansion
	wt. % Hydrogen Peroxide	Vsoln​ = Lsoln (cm)	Vo−1​ = L0-1 (cm)	Vo−2​ = Lo-2 (cm)	Vo−3​ = L0-3 (cm)	Expansion Ratio-1	Expansion Ratio-2	Expansion Ratio-3	Mean Expansion Ratio	SEM		Source of Variation	Sum of Squares (SS)	Degrees of Freedom (df)	Mean Square (MS)	F-statistic	P-value
	1.2	0.55	2.5	2.7	2.4	4.55	4.91	4.36	4.61	0.16		Between Groups	42.2229	4	10.5557	124.615	1.74e-08
	2.4	0.55	3.3	3.5	3.3	6	6.36	6	6.12	0.12		Within Groups	0.8471	10	0.0847
	3.6	0.55	3.5	3.6	3.8	6.36	6.55	6.91	6.61	0.16		Total	43.07	14
	4.8	0.55	4.2	4.4	4	7.64	8	7.27	7.64	0.21		the ANOVA I performed using the individual expansion ratios for all five Wt. % Hydrogen Peroxide concentrations, here are the results tabulated:
	6	0.55	5.2	5.23	5.5	9.45	9.51	10	9.65	0.17
	Table One
	Final volume= 10 mL
	Gelatin = 5 wt. %										Comparison of wt. % H₂O₂	Difference in Means	95% Confidence Interval (Lower)	95% Confidence Interval (Upper)	Adjusted p-value	Significant (α = 0.05)
	Catalase= 0.2 wt. %										2.4 – 1.2	1.5133	0.7313	2.2954	0.0006029	Yes
	GA =2.5 wt. %										3.6 – 1.2	2	1.2179	2.7821	5.75e-05	Yes
	Temp = 37 °C										4.8 – 1.2	3.03	2.2479	3.8121	1.3e-06	Yes
											6.0 – 1.2	5.0467	4.2646	5.8287	< 0.0000001	Yes
											3.6 – 2.4	0.4867	-0.2954	1.2687	0.311727	No
											4.8 – 2.4	1.5167	0.7346	2.2987	0.0005923	Yes
											6.0 – 2.4	3.5333	2.7513	4.3154	3e-07	Yes
											4.8 – 3.6	1.03	0.2479	1.8121	0.0100681	Yes
											6.0 – 3.6	3.0467	2.2646	3.8287	1.2e-06	Yes
											6.0 – 4.8	2.0167	1.2346	2.7987	5.34e-05	Yes
				Graph one

## Sheet: Peroxide-Stability
	wt. % Hydrogen Peroxide	Vo-1	Vo-2	Vo-3	V24-1	V24-2	V24-3	V24-1/Vo-1	V24-2/Vo-2	V24-3/Vo-3	Mean V24/Vo	SEM (V24/Vo)			Source of Variation	Sum of Squares (SS)	Degrees of Freedom (df)	Mean Square (MS)	F-statistic	P-value
	1.2	2.5	2.7	2.4	1.7	1.8	2	0.68	0.6667	0.8333	0.7267	0.0535			Between Groups	0.5408	4	0.1352	38.6686	4.69 × 10⁻⁶
	2.4	3.3	3.5	3.3	2.2	2.4	2.1	0.6667	0.6857	0.6364	0.6629	0.0144			Within Groups (Error)	0.0349	10	0.00349
	3.6	3.5	3.6	3.8	2.4	2.6	2.3	0.6857	0.7222	0.6053	0.6711	0.0345			Total	0.5757	14
	4.8	4.2	4.4	4	2.1	2.4	2.5	0.5	0.5455	0.625	0.5568	0.0365
	6	5.2	5.23	5.5	1	1.2	0.98	0.1923	0.2294	0.1782	0.2	0.0153
	Final volume= 10 mL
	Gelatin = 5 wt. %
	Catalase= 0.2 wt. %
	GA =2.5 wt. %													Comparison of wt.% Hydrogen Peroxide	Difference in Means	95% Lower CI	95% Upper CI	Adjusted p-value	Significance (α = 0.05)
	Temp = 37 °C													1.2 − 2.4	−0.0637	−0.2230	0.0956	0.6858	No
														1.2 − 3.6	−0.0556	−0.2149	0.1037	0.7768	No
														1.2 − 4.8	−0.1698	−0.3289	−0.0107	0.0351	Yes
														1.2 − 6.0	−0.5267	−0.6858	−0.3675	< 0.0001	Yes
														2.4 − 3.6	0.0081	−0.1510	0.1673	0.9998	No
														2.4 − 4.8	−0.1061	−0.2653	0.0531	0.255	No
														2.4 − 6.0	−0.4630	−0.6222	−0.3039	< 0.0001	Yes
														3.6 − 4.8	−0.1142	−0.2734	0.0449	0.2016	No
														3.6 − 6.0	−0.4711	−0.6303	−0.3119	< 0.0001	Yes
														4.8 − 6.0	−0.3569	−0.5161	−0.1977	0.0002	Yes

## Sheet: Cat-Expanstion
	Varying the Catalase Conc.
	wt. % Catalase	Vsoln = Lsoln	Vfoam-1	Vfoam-2	Vfoam-3	Expansion Ratio-1	Expansion Ratio-2	Expansion Ratio-3	Mean Expansion Ratio	SEM				Source	Sum of Squares	df	F	p-value
	0.05	0.55	2	2.2	1.8	3.64	4	3.27	3.64	0.2099				Catalase	56.9677	4	113.025	2.80 × 10⁻⁸
	0.1	0.55	4.1	4.5	4.2	7.45	8.2	7.64	7.76	0.2251				Residual	1.2601	10	—	—
	0.2	0.55	5	5	4.9	9.1	9.1	8.9	9.03	0.0667
	0.3	0.55	4.5	4.9	4.7	8.2	8.9	8.54	8.55	0.2021
	0.4	0.55	4.5	4.3	4.8	8.2	7.82	8.73	8.24	0.2642
												Comparison of wt.% Catalase	Difference in Means	95% Lower CI	95% Upper CI	Adjusted p-value	Significance (α = 0.05)
	Final volume= 10 mL											0.05 − 0.10	−4.12	−4.87	−3.37	< 0.0001	Yes
	Gelatin = 5 wt. %											0.05 − 0.20	−5.39	−6.14	−4.64	< 0.0001	Yes
	Peroxide 3.6 wt. %											0.05 − 0.30	−4.91	−5.66	−4.16	< 0.0001	Yes
	GA =2.5 wt. %											0.05 − 0.40	−4.60	−5.35	−3.85	< 0.0001	Yes
	Temp = 37 C											0.10 − 0.20	−1.27	−2.02	−0.52	0.0001	Yes
												0.10 − 0.30	−0.79	−1.54	−0.04	0.06	No
												0.10 − 0.40	−0.48	−1.23	0.27	0.356	No
												0.20 − 0.30	0.48	−0.27	1.23	0.356	No
												0.20 − 0.40	0.79	0.04	1.54	0.06	No
												0.30 − 0.40	0.31	−0.44	1.06	0.74	No

## Sheet: Cat-Stability
	Varying the Catalase Conc.
	wt. % Catalase	Vo-1	Vo-2	Vo-3	V24-1	V24-2	V24-3	V24-1/Vo-1	V24-2/Vo-2	V24-3/Vo-3	Mean V24/Vo	SEM (V24/Vo)		Source	Sum of Squares	df	Mean Square	F	p-value
	0.05	2	2.1	2.3	0.7	0.9	1	0.35	0.429	0.435	0.404	0.027		Catalase	0.0322	4	0.0081	6.5845	0.0073
	0.1	4	4.5	4.3	2	2.2	2.1	0.5	0.489	0.488	0.492	0.004		Residual	0.0122	10	0.0012	—	—
	0.2	5	4.9	5.4	2.5	2.8	2.9	0.5	0.571	0.537	0.536	0.021
	0.3	4.5	5.1	4.9	2.3	2.7	2.2	0.511	0.529	0.449	0.497	0.024
	0.4	4.5	4.6	4.8	2.5	2.4	2.4	0.556	0.522	0.5	0.526	0.016
														Comparison of wt.% Catalase	Difference in Means	95 % Lower CI	95 % Upper CI	Adjusted p-value	Significance (α = 0.05)
														0.05 vs. 0.10	0.0877	-0.0063	0.1816	0.0703	No
	Final volume= 10 mL													0.05 vs. 0.20	0.1313	0.0374	0.2253	0.0068	Yes
	Gelatin = 5 wt. %													0.05 vs. 0.30	0.0917	-0.0023	0.1856	0.0566	No
	Peroxide 3.6 wt. %													0.05 vs. 0.40	0.1213	0.0274	0.2153	0.0114	Yes
	GA =2.5 wt. %													0.10 vs. 0.20	0.0437	-0.0503	0.1376	0.568	No
	Temp = 37 C													0.10 vs. 0.30	0.004	-0.09	0.098	0.9999	No
														0.10 vs. 0.40	0.0337	-0.0603	0.1276	0.7627	No
														0.20 vs. 0.30	-0.0397	-0.1336	0.0543	0.6471	No
														0.20 vs. 0.40	-0.01	-0.104	0.084	0.9962	No
														0.30 vs. 0.40	0.0297	-0.0643	0.1236	0.832	No

## Sheet: GA-Expansion
Varying the GA Conc.
	wt. % GA	Vsoln (L)	Vfoam-1 (L)	Vfoam-2 (L)	Vfoam-3 (L)	ER-1	ER-2	ER-3	Mean ER	SEM
	1	0.55	4.5	4.3	4.8	8.18	7.82	8.73	8.24	0.27
	2	0.55	4	4.2	3.9	7.27	7.64	7.09	7.33	0.16
	3	0.55	3.6	3.8	3.7	6.55	6.91	6.73	6.73	0.1
	4	0.55	2	2.4	2.1	3.64	4.36	3.82	3.94	0.22
	5	0.55	2.2	2.2	2.4	4	4	4.36	4.12	0.12
						Source of Variation	Sum of Squares (SS)	Degrees of Freedom (df)	Mean Square (MS)	F-statistic	p-value
						Between Groups	13.69	4	3.42	112.16	2.9 x 10−8
						Within Groups	0.31	10	0.03
						Total	14	14
						Comparison of wt.% GA	Difference in Means	95% Lower CI	95% Upper CI	Adjusted p-value	Significance (α = 0.05)
						1 − 2	−0.91	−1.764	−0.056	0.0357	Yes
						1 − 3	−1.51	−2.367	−0.660	0.0012	Yes
						1 − 4	−4.30	−5.157	−3.450	< 0.0001	Yes
						1 − 5	−4.12	−4.977	−3.270	< 0.0001	Yes
						2 − 3	−0.60	−1.457	0.25	0.2137	No
						2 − 4	−3.39	−4.247	−2.540	< 0.0001	Yes
						2 − 5	−3.21	−4.067	−2.360	< 0.0001	Yes
						3 − 4	−2.79	−3.644	−1.936	< 0.0001	Yes
				Final volume= 10 mL		3 − 5	−2.61	−3.464	−1.756	< 0.0001	Yes
				Gelatin = 5 wt. %		4 − 5	0.18	−0.674	1.034	0.9533	No
				Peroxide 3.6 wt. %
				Catalase = 0.2 wt. %
				Temp = 37 C

## Sheet: GA-Stability
Varying the GA Conc.
	wt. % GA	Vo-1	Vo-2	Vo-3	V24-1	V24-2	V24-3	V24-1/Vo-1	V24-2/Vo-2	V24-3/Vo-3	Mean V24/Vo	SEM (V24/Vo)
	1	4.5	4.3	4.6	2	2.1	1.9	0.44	0.49	0.41	0.45	0.02
	2	4	4.2	3.8	1.8	2.2	2	0.45	0.52	0.53	0.5	0.03
	3	3.6	3.8	3.5	2.2	2.1	1.8	0.61	0.55	0.51	0.56	0.03
	4	2.2	2.3	2.1	1.2	1.1	1.2	0.55	0.48	0.57	0.53	0.03
	5	2.2	2.2	2	1.2	0.9	1.1	0.55	0.41	0.55	0.5	0.05
										Source of variation	SS	df	MS	F	p-value
										Between groups	0.02057	4	0.00514	1.73	0.219
										Within groups	0.02967	10	0.00297
										Total	0.05024	14
										Comparison of wt.% GA	Difference in Means	95% Lower CI	95% Upper CI	Adjusted p-value	Significance
										1 − 2	0.0533	−0.0930	0.1997	0.7521	No
										1 − 3	0.11	−0.0364	0.2564	0.173	No
										1 − 4	0.0867	−0.0597	0.233	0.3539	No
										1 − 5	0.0567	−0.0897	0.203	0.7116	No
										2 − 3	0.0567	−0.0897	0.203	0.7116	No
										2 − 4	0.0333	−0.1130	0.1797	0.9393	No
										2 − 5	0.0033	−0.1430	0.1497	1	No
										3 − 4	−0.0233	−0.1697	0.123	0.9827	No
										3 − 5	−0.0533	−0.1997	0.093	0.7521	No
	Final volume= 10 mL									4 − 5	−0.0300	−0.1764	0.1164	0.9576	No
	Gelatin = 5 wt. %
	Peroxide 3.6 wt. %
	Catalase = 0.2 wt. %
	Temp = 37 C

## Sheet: Graphs
	wt. % Gelatine	Mean Expansion Ratio	SEM	Mean of V24/V0	SEM of V24/V0
	1	11.15	0.22	0.17	0.0088
	2	11.94	0.11	0.16	0.01
	3	10.97	0.16	0.67	0.0177
	4	10.79	0.16	0.67	0.026
	5	10.61	0.06	0.75	0.0153
	wt. % Peroxide	Mean Expansion Ratio	SEM	Mean V24/Vo	SEM (V24/Vo)
	1.2	4.61	0.16	0.7267	0.0535
	2.4	6.12	0.12	0.6629	0.0144
	3.6	6.61	0.16	0.6711	0.0345
	4.8	7.64	0.21	0.5568	0.0365
	6	9.65	0.17	0.2	0.0153
	wt. % Catalase x 10	wt. % Catalase	Mean Expansion Ratio	SEM	Mean V24/Vo	SEM (V24/Vo)
	0.5	0.05	3.64	0.2099	0.404	0.027
	1	0.1	7.76	0.2251	0.492	0.004
	2	0.2	9.03	0.0667	0.536	0.021
	3	0.3	8.55	0.2021	0.497	0.024
	4	0.4	8.24	0.2642	0.526	0.016
	wt. % GA	Mean Expansion Ratio	SEM	Mean V24/Vo	SEM (V24/Vo)
	1	8.24	0.27	0.45	0.02
	2	7.33	0.16	0.5	0.03
	3	6.73	0.1	0.56	0.03
	4	3.94	0.22	0.53	0.03
	5	4.12	0.12	0.5	0.05
